# Supplementary material for: Detection of Vesicular Stomatitis Virus Indiana from Insects Collected during the 2020 Outbreak in Kansas, USA
Source: MDPI journal article supplement (doi:10.3390/pathogens10091126), 2021-09-02
Supplement: s1 [file s1]

**Table S1:** Vesicular stomatitis virus Indiana sequences downloaded from GenBank

| <b>GenBank Accesion</b> | <b>Isolate</b> | <b>Isolation data</b>              |
|-------------------------|----------------|------------------------------------|
| MW373779                | IN0820KSE      | Swabs from Kansas horses in 2020   |
| MW373778                | IN0720KSE3     | Swabs from Kansas horses in 2020   |
| MW373777                | IN0720KSE2     | Swabs from Kansas horses in 2020   |
| MW373776                | IN0720KSE      | Swabs from Kansas horses in 2020   |
| MT437285                | IN0919COB      | Swabs from Colorado cattle in 2019 |
| MT437284                | IN0919WYB1     | Swabs from Wyoming cattle in 2019  |
| MT437283                | IN0919WYB2     | Swabs from Wyoming cattle in 2019  |
